# Supplementary material for: RETRACTED: Network Pharmacology and Molecular Modeling to Elucidate the Potential Mechanism of Neem Oil against Acne vulgaris
Source: MDPI journal article supplement (doi:10.3390/molecules28062849), 2023-03-21
Supplement: s1 [file s1]

## **Supplementary Materials**

### **Network Pharmacology and Molecular Modeling to Elucidate the Potential Mechanism of Neem Oil against Acne Vulgaris**

Adeola Tawakalitu Kola-Mustapha <sup>1,2</sup>, Muhabat Adeola Raji <sup>3</sup>, Oluwakorede Adedeji <sup>2</sup>  
and George Oche Ambrose <sup>4,\*</sup>

<sup>1</sup> College of Pharmacy, Alfaisal University Riyadh, Riyadh 11461, Saudi Arabia

<sup>2</sup> Department of Pharmaceutics and Industrial Pharmacy, Faculty of Pharmaceutical Sciences, University of Ilorin, Ilorin 240101, Nigeria

<sup>3</sup> Department of Microbiology & Immunology, Alfaisal University, Riyadh 11461, Saudi Arabia

<sup>4</sup> University of Ilorin Teaching Hospital, Ilorin 240101, Nigeria

\* Correspondence: ocheab1@gmail.com; Tel.: +234-8140699446

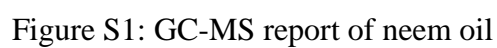

Table S1: Phytocompounds from neem oil based on GC-MS

| Pk# | RT     | Area%  | Compound name                                                                                                                                                                                                                 |
|-----|--------|--------|-------------------------------------------------------------------------------------------------------------------------------------------------------------------------------------------------------------------------------|
| 1   | 2.193  | 108.73 | Cyclohexane                                                                                                                                                                                                                   |
| 2   | 7.911  | -0.10  | (E)-2-bromobutyloxychalcone d-Threo-O-ethylthreonine<br>Indolizine, 2-(4-methylphenyl)-                                                                                                                                       |
| 3   | 7.998  | -0.22  | Cyclopentasiloxane, decamethyl- Heptasiloxane,                                                                                                                                                                                |
| 4   | 9.793  | -0.76  | Cyclohexasiloxane, dodecamethyl-                                                                                                                                                                                              |
| 5   | 10.901 | -0.05  | Hexahydropyridine, 1-methyl-4-[4,5 dihydroxyphenyl]- 4-(1H-[1,2,4]Triazole-3-carbonyl)- piperazine-1-carboxylic acid ethyl ester Oleic Acid                                                                                   |
| 6   | 11.120 | -0.69  | Cycloheptasiloxane, tetradecamethyl- 3-Isopropoxy-1,1,1,7,7,7-hexamethyl-3,5,5-tris(trimethylsiloxy)tetra siloxane 2-(2',4',4',6',6',8',8'-Heptamethyltetrasiloxan-2'-yloxy)-2,4,4,6,6,8,8,10,10-nonamethylcyclopentasiloxane |
| 7   | 11.251 | -0.09  | Hexasiloxane, 1,1,3,3,5,5,7,7,9,9, 11,11-dodecamethyl-Benzeneacetic acid, .alpha.-oxo trimethylsilyl ester 1-Propanone, 1,3-diphenyl-3-(trimethylsilyl)-                                                                      |
| 8   | 11.338 | -0.02  | 1H-Benzo[4,5]furo[3,2-f]indole 2,3,5,6-Tetrafluorophenyl isothiocyanate N-Methyl-1-adamantaneacetamide                                                                                                                        |
| 9   | 11.664 | -0.14  | 1,4-Cyclohexanedimethanamine<br>E-11-Tetradecenoic acid<br>Chloroacetic acid, 2-tridecyl este                                                                                                                                 |
| 10  | 11.951 | -0.28  | Silane, trimethyl(4-phenylbutyl)- Acetamide, 2-[2,3-dihydro-2-methyl-5-(4-methylphenyl)-1,3,4-thiadiaz ol-2-yl]-N-phenyl- 2-Fluoro-5-(trifluoromethyl) benzamide                                                              |
| 11  | 12.058 | -0.04  | Oleic Acid<br>l-(+)-Ascorbic acid 2,6-dihexadecanoate<br>D-Glucopyranose, 4,6-O-octylidene-                                                                                                                                   |
| 12  | 12.208 | -0.35  | N-(Trifluoroacetyl)-O,O',O''-tris(trimethylsilyl)epinephrine<br>Cyclooctasiloxane, hexadecamethyl- N-(Trifluoroacetyl)-O,O',O''-tris(trimethylsilyl)norepinephrine                                                            |
| 13  | 12.302 | -0.07  |                                                                                                                                                                                                                               |

|    |        |       |                                                                                                                                                                                                                    |
|----|--------|-------|--------------------------------------------------------------------------------------------------------------------------------------------------------------------------------------------------------------------|
|    |        |       | Oleic Acid<br>Trichloroacetic acid, 2-tetradecyl<br>ester Methyl pentadecyl ether                                                                                                                                  |
| 14 | 12.383 | -0.03 | 9-Octadecenoic acid (Z)-, 2,3-dihydroxypropyl ester<br>Cyclododecane<br>Ethyl 9-hexadecenoate                                                                                                                      |
| 15 | 12.646 | -0.09 | Oleic Acid<br>6-Octadecenoic acid<br>9-Octadecenoic acid, (E)-                                                                                                                                                     |
| 16 | 12.815 | -0.09 | 13-Octadecenal, (Z)-<br>E-11-Hexadecenoic acid, ethyl este<br>cis-11-Hexadecenal                                                                                                                                   |
| 17 | 13.109 | -0.45 | Morphinan, 7,8-didehydro-4,5-epoxy-17-methyl-3,6-<br>bis[(trimethylsilyl)oxy]-, (5.alpha.,6.alpha.)-<br>Cyclononasiloxane, octadecamethyl- Octasiloxane,<br>1,1,3,3,5,5,7,7,9,9, 11,11,13,13,15,15-hexadecamethyl- |
| 18 | 13.346 | -0.26 | Oleic Acid<br>Oleic Acid<br>6-Octadecenoic acid, (Z)-                                                                                                                                                              |
| 19 | 13.396 | -0.09 | Oleic Acid<br>2-Trifluoroacetoxypentadecane<br>2-Tetradecanol                                                                                                                                                      |
| 20 | 13.447 | -0.13 | Oleic Acid<br>Z-10-Pentadecen-1-ol<br>cis-1,2-Cyclododecanediol                                                                                                                                                    |
| 21 | 13.490 | -0.07 | Oleic Acid<br>Cyclopentadecanone, 2-hydroxy-<br>6-Octadecenoic acid, (Z)-                                                                                                                                          |
| 22 | 13.528 | -0.09 | Cyclopentadecanone, 2-hydroxy-<br>9-Octadecenal, (Z)-<br>13-Octadecenal, (Z)-                                                                                                                                      |
| 23 | 13.572 | -0.11 | 13-Octadecenal, (Z)-<br>Oleic Acid<br>Butyl 9-octadecenoate or 9-18:1                                                                                                                                              |
| 24 | 13.753 | -0.49 | cis-11-Hexadecenal<br>Cycloeicosane                                                                                                                                                                                |

|    |        |       |                                                                                                            |
|----|--------|-------|------------------------------------------------------------------------------------------------------------|
|    |        |       | 9-Hexadecenoic acid, methyl ester, (Z)-                                                                    |
| 25 | 13.797 | -0.33 | Cyclopropaneoctanal, 2-octyl-<br>9-Octadecenal, (Z)-<br>9-Tricosene, (Z)-                                  |
| 26 | 13.897 | -0.30 | Oleic Acid<br>n-Propyl 9-octadecenoate<br>1,3-Dioxolane, 4-ethyl-5-octyl-2,2-bis(trifluoromethyl)-, trans- |
| 27 | 14.041 | -0.77 | Oleic Acid<br>2-Methyl-Z, Z-3,13-octadecadienol<br>9-Octadecenoic acid (Z)-, methyl ester                  |
| 28 | 14.078 | -0.49 | 13-Octadecenal, (Z)-<br>cis-11-Hexadecenal<br>1-Heptadecene                                                |
| 29 | 14.160 | -0.26 | Z-(13,14-Epoxy)tetradec-11-en-1-ol<br>acetate cis-7,cis-11-Hexadecadien-1-yl acetate 2-Decen-1-ol, (E)-    |
| 30 | 14.216 | -0.21 | 9-Hexadecenoic acid, methyl ester, (Z)- 12-Octadecenoic acid, methyl ester<br>Ethyl 9-hexadecenoate        |
| 31 | 14.266 | -0.10 | Oleic Acid<br>3-Trifluoroacetoxypentadecane<br>2-Trifluoroacetoxypentadecane                               |
| 32 | 14.285 | -0.08 | Oleic Acid<br>E-11-Tetradecenoic acid<br>Z-6-Pentadecen-1-ol acetate                                       |
| 33 | 14.341 | -0.32 | Oleic Acid<br>l-(+)-Ascorbic acid 2,6-dihexadecanoate<br>9-Hexadecenoic acid, octadecyl ester              |
| 34 | 14.397 | -0.43 | Oleic Acid<br>5,14,23-Octadecatrien-14,15-diol<br>Propanamide, N-(3-methoxyphenyl)-2,2-dimethyl-           |
| 35 | 14.591 | -0.24 | Oleic Acid<br>Methyl pentadecyl ether<br>Dodecane, 1-(methoxymethoxy)-                                     |

|    |        |       |                                                                                                                |
|----|--------|-------|----------------------------------------------------------------------------------------------------------------|
| 36 | 14.679 | -0.23 | n-Propyl 11-octadecenoate<br>Methyl pentadecyl ether<br>Oleic Acid                                             |
| 37 | 14.935 | -0.05 | Hexadecanoic acid, 2-hydroxy-, methyl ester<br>Oleic Acid<br>Methyl pentadecyl ether                           |
| 38 | 15.004 | -0.19 | 15-Tetracosenoic acid, methyl ester, (Z)- Oxacyclotetradecane-2,11-dione, 13-methyl- 6-Octadecenoic acid, (Z)- |
| 39 | 15.092 | -0.03 | Oleic Acid<br>9-Hexadecenoic acid, octadecyl ester<br>Oleic Acid                                               |
